# Supplementary material for: Explore potential immune-related targets of leeches in the treatment of type 2 diabetes based on network pharmacology and machine learning
Source: Front Genet. 2025 Apr 14;16:1554622. doi: 10.3389/fgene.2025.1554622 (PMC12036332; doi:10.3389/fgene.2025.1554622)
Supplement: Supplementary file 1 [file Table1.xlsx]

## Sheet: sheet1
Ingredient id	Ingredient name	Ingredient alias
HBIN016387	antithrombin	NA
HBIN017660	bdellin b-3	NA
HBIN017661	bdellins	NA
HBIN017950	beta-acethlgalactorsaminidase	NA
HBIN018348	beta-ursolic acid	NA
HBIN020131	ceramide-glycanase	NA
HBIN020401	cholesterol esterase	NA
HBIN021703	crocetin	2,4,6,8,10,12,14-Hexadecaheptaenedioic acid, 2,6,11,15-tetramethyl-, (all-E)- (8CI); C08588; (2E,4E,6E,8E,10E,12E,14E)-2,6,11,15-tetramethylhexadeca-2,4,6,8,10,12,14-heptaenedioate; AIDS-073359; 2,4,6,8,10,12,14-Hexadecaheptaenedioic acid, 2,6,11,15-tetramethyl-;.alpha.-Crocetin; 8,8'-diapo-8,8'-carotenedioate; 8,8'-diapo-psi,psi-carotenedioate; AIDS073359; 2,4,6,8,10,12,14-Hexadecaheptaenedioic …
HBIN021714	crocin	Crocin; 42553-65-1; Bis(6-O-beta-D-glucopyranosyl-beta-D-glucopyranosyl) 8,8'-diapo-psi,psi-carotenedioate; (2E,4E,6E,8E,10E,12E,14E)-2,6,11,15-tetramethylhexadeca-2,4,6,8,10,12,14-heptaenedioic acid bis[(2S,3R,4S,5S,6R)-3,4,5-trihydroxy-6-[[(2R,3R,4S,5S,6R)-3,4,5-trihydroxy-6-methylol-tetrahydropyran-2-yl]oxymethyl]tetrahydropyran-2-yl] ester; bis[(2S,3R,4S,5S,6R)-3,4,5-trihydroxy-6-[[(2R,3R,4S,…
HBIN021735	croomionidine	(8S,10R,13S)-17-[(1S)-1-(dimethylamino)ethyl]-N,10,13-trimethyl-2,3,4,7,8,9,11,12,14,15,16,17-dodecahydro-1H-cyclopenta[a]phenanthren-3-amine; AC1NSTX4
HBIN022846	Deacetyl asperulosidic acid methyl ester	methyl (1S,4aS,5S,7aS)-5-hydroxy-7-(hydroxymethyl)-1-[(2S,3R,4S,5S,6R)-3,4,5-trihydroxy-6-(hydroxymethyl)tetrahydropyran-2-yl]oxy-1,4a,5,7a-tetrahydrocyclopenta[d]pyran-4-carboxylate; deacetyl asperulosidicacid methyl ester; (1S,4aS,5S,7aS)-5-hydroxy-7-(hydroxymethyl)-1-[[(2S,3R,4S,5S,6R)-3,4,5-trihydroxy-6-(hydroxymethyl)-2-tetrahydropyranyl]oxy]-1,4a,5,7a-tetrahydrocyclopenta[d]pyran-4-carboxyl…
HBIN023500	destabilase	NA
HBIN024325	d-mannitol	1630-EP2295416A2; 1630-EP2305663A1; 1630-EP2272537A2; Manna sugar; 1630-EP2316833A1; FT-0628167; 1630-EP2270005A1; HY-N0378; D-Mannitol, SAJ special grade, >=99.0%; RP24311; 1630-EP2305641A1; D-Mannitol (JP17); SORBITOL-MANNITOL IN PLASTIC CONTAINER; 1630-EP2301931A1; 1630-EP2287160A1; CS-2494; AC-12776; 1630-EP2281818A1; 1630-EP2305681A1; AB1002081; EINECS 201-770-2; 1630-EP2281559A1; 1630-EP230…
HBIN024326	d-mannoheptulose	Sedoheptulose; (3S,4R,5R,6R)-1,3,4,5,6,7-hexahydroxyheptan-2-one; L-Galactoheptulos; D-Sedoheptulose, >=95% (TLC); ZINC8579422; altro-Heptulose; 40A0W1XJ6X; UNII-40A0W1XJ6X; D-Mannoheptulose; AC1NUSHL; SCHEMBL119427; CHEBI:16802; D-altro-hept-2-ulose; D-Altro-2-heptulose; 3019-74-7
HBIN024556	dulcitol	C01507; C-25615; Sorbo; I0725; I14-60913; KB-53227; CTK8B4049; L-Iditol, >=98%; FBPFZTCFMRRESA-UNTFVMJOSA-N; AC1NUSPZ; DB-051581; 488-45-9; ANW-43765; CHEBI:18202; MolPort-003-848-134; L-Iditol; CC-29952; AKOS024258141; FT-0627851; K-9194; KS-00000XZK; WURCS=1.0/1,0/[h2121h]; SCHEMBL435775; ZINC5178945; W-202860; (2S,3R,4R,5S)-hexane-1,2,3,4,5,6-hexol; L-Idit; MFCD00064289
HBIN024909	eglins	NA
HBIN025099	enoxaparin	NA
HBIN027370	GARDENOSIDE	Gardenoside; C09779; CHEBI:5277; 24512-62-7; methyl (1R,4aR,7R,7aR)-7-hydroxy-7-(hydroxymethyl)-1-[(2S,3R,4S,5S,6R)-3,4,5-trihydroxy-6-(hydroxymethyl)tetrahydropyran-2-yl]oxy-4a,7a-dihydro-1H-cyclopenta[c]pyran-4-carboxylate; gardenoside; methyl (1R,4aR,7R,7aR)-1-(beta-D-glucopyranosyloxy)-7-hydroxy-7-(hydroxymethyl)-1,4a,7,7a-tetrahydrocyclopenta[c]pyran-4-carboxylate
HBIN027373	gardnerilin a	Gardnerilin A
HBIN027441	Genioisidic acid	genioisidic acid
HBIN027448	genipingentiobioside	genipin-gentiobioside
HBIN027449	genipinic acid	2-acetyloxy-2-[(3S,4R)-3-hydroxy-3,4,5,6-tetrahydro-1H-cyclopenta[c]furan-4-yl]acetic acid; AC1NSVS9; genipinicacid
HBIN027450	geniposide	AKOS015965362; Cyclopenta(c)pyran-4-carboxylic acid, 1-(beta-D-glucopyranosyloxy)-1,4a,5,7a-tetrahydro-7-(hydroxymethyl)-, methyl ester, (1S,4aS,7aS)-; 27745-20-6; Cyclopenta(c)pyran-4-carboxylic acid, 1-(beta-D-glucopyranosyloxy)-1,4a,5,7a-tetrahydro-7-(hydroxymethyl)-, methyl ester, (1S-(1alpha,4aalpha,7aalpha))-; ZINC03882101; 24512-63-8; Geniposide; (1S,4aS,7aS)-7-(hydroxymethyl)-1-[[(2S,3R,4…
HBIN028171	glycosphingolipid-splitting enzyme	NA
HBIN029056	heparin	heparin
HBIN029420	hirudin	NA
HBIN029421	hirudin-pa	NA
HBIN033045	l-galactoheptulose	Sedoheptulose; (3S,4R,5R,6R)-1,3,4,5,6,7-hexahydroxyheptan-2-one; D-Sedoheptulose, >=95% (TLC); ZINC8579422; altro-Heptulose; 40A0W1XJ6X; UNII-40A0W1XJ6X; AC1NUSHL; SCHEMBL119427; CHEBI:16802; D-altro-hept-2-ulose; D-Altro-2-heptulose; 3019-74-7
HBIN033352	lipase	NA
HBIN033367	liquemin n	NA
HBIN034957	methyl(2e,8z)-decadien-4,6-diynoate	NA
HBIN036274	nadroparin	NA
HBIN037820	o-desulfated heparin	NA
HBIN040844	propionylchlinesterase	NA
HBIN047613	ursolic acid	ursolicacid; U6753_SIGMA; AIDS-039057; AKOS022168209; Urs-12-en-28-oic acid, 3beta-hydroxy- (8CI); 77-52-1; s2370; 3beta-Hydroxyurs-12-en-28-oic acid; SMR000445681; NSC4060; MLS000728569; Ursolic acid; TOS-BB-0966; 3beta-Hydroxy-12-ursen-28-ic acid; (1S,2R,4R,6aS,6bR,8aR,10S,12aR,12bR,14bR)-10-hydroxy-1,2,6a,6b,9,9,12a-heptamethyl-2,3,4,4a,5,6,6b,7,8,8a,9,10,11,12,12a,12b,13,14b-octadecahydro-1H-…
